# Supplementary material for: Assessment of remote sensing-based indices for drought monitoring in the north-western region of Bangladesh
Source: PubMed Central journal article supplement (PMC9900510; doi:10.1016/j.heliyon.2023.e13016), 2023-01-21
Supplement: mmc1.pdf [file mmc1.pdf]

## Supplementary Information for

### Assessment of remote sensing-based indices for drought monitoring in the North-western region of Bangladesh

**Ashim C. Das<sup>1</sup>, Shihab A. Shahriar<sup>1,2</sup>, Md. A. Chowdhury<sup>3</sup>, Md. Lokman Hossain<sup>4,5</sup>, Shahed Mahmud<sup>1</sup>, Md. Kamruzzaman Tusar<sup>1</sup>, Romel Ahmed<sup>6</sup>, Mohammed Abdus Salam<sup>1\*</sup>**

<sup>1</sup>Department of Environmental Science and Disaster Management, Noakhali Science and Technology University, Noakhali 3814, Bangladesh

<sup>2</sup>Department of Earth and Atmospheric Sciences University of Houston, TX 77004, USA

<sup>3</sup>Department of Climate and Disaster Management, Jashore University of Science and Technology, Jashore- 7408, Bangladesh

<sup>4</sup>Department of Environment Protection Technology, German University Bangladesh, Gazipur, Bangladesh

<sup>5</sup>Department of Geography, Hong Kong Baptist University, Hong Kong, China

<sup>6</sup>Department of Forestry and Environmental Science, Shahjalal University of Science and Technology, Sylhet 3114, Bangladesh

\*Corresponding Author

**Mohammed Abdus Salam** (E-mail: [masalam.esdm@nstu.edu.bd](mailto:masalam.esdm@nstu.edu.bd));

Telephone: +8801917635348

**Table S1:** Detailed information of the collected satellite data.

| <b>Year</b> | <b>Acquisition Date</b> | <b>Path/Row</b> | <b>Landsat</b> | <b>Sensor</b> | <b>Number of Bands</b> | <b>Cell Size</b> | <b>Data Format</b> |
|-------------|-------------------------|-----------------|----------------|---------------|------------------------|------------------|--------------------|
| 1990        | 14/11/1990              | 138-42          | 5              | TM            | 7                      | 30               | GeoTiff            |
|             | 14/11/1990              | 138-43          |                |               |                        |                  |                    |
|             | 23/10/1990              | 139-42          |                |               |                        |                  |                    |
|             | 23/10/1990              | 139-43          |                |               |                        |                  |                    |
| 1995        | 28/10/1995              | 138-42          | 5              | TM            | 7                      | 30               | GeoTiff            |
|             | 28/10/1995              | 138-43          |                |               |                        |                  |                    |
|             | 13/10/1995              | 139-42          |                |               |                        |                  |                    |
|             | 12/10/1995              | 139-43          |                |               |                        |                  |                    |
| 2000        | 18/10/2000              | 138-42          | 5              | TM            | 7                      | 30               | GeoTiff            |
|             | 7/10/2000               | 138-43          |                |               |                        |                  |                    |
|             | 13/11/2000              | 139-42          |                |               |                        |                  |                    |
|             | 16/11/2000              | 139-43          |                |               |                        |                  |                    |
| 2005        | 07/11/2005              | 138-42          | 5              | TM            | 7                      | 30               | GeoTiff            |
|             | 08/11/2005              | 138-43          |                |               |                        |                  |                    |
|             | 14/11/2005              | 139-42          |                |               |                        |                  |                    |
|             | 14/11/2005              | 139-43          |                |               |                        |                  |                    |
| 2010        | 05/11/2010              | 138-42          | 8              | OLI/TIRS      | 11                     | 30               | GeoTiff            |
|             | 11/10/2010              | 138-43          |                |               |                        |                  |                    |
|             | 12/11/2010              | 139-42          |                |               |                        |                  |                    |
|             | 14/11/2010              | 139-43          |                |               |                        |                  |                    |
| 2015        | 17/10/2015              | 138-42          | 8              | OLI/TIRS      | 11                     | 15,30            | GeoTiff            |
|             | 18/10/2015              | 138-43          |                |               |                        |                  |                    |
|             | 26/11/2015              | 139-42          |                |               |                        |                  |                    |
|             | 25/11/2015              | 139-43          |                |               |                        |                  |                    |
| 2020        | 02/10/2020              | 138-42          | 8              | OLI/TIRS      | 11                     | 15,30            | GeoTiff            |
|             | 02/10/2020              | 138-43          |                |               |                        |                  |                    |
|             | 23/11/2020              | 139-42          |                |               |                        |                  |                    |
|             | 23/11/2020              | 139-43          |                |               |                        |                  |                    |
